# Supplementary material for: Realizing the reusability of leachate for the hydrometallurgical recycling of spent lithium cobalt oxide by dynamically regulating the solubility product
Source: Royal Society of Chemistry journal article supplement (doi:10.1039/d3gc04166b), 2024-01-01
Supplement: d3gc04166b2.pdf [file d3gc04166b2.pdf]

## Supporting Information

# Realizing reusability of leachate for hydrometallurgical recycling of spent lithium cobalt oxide by dynamically regulating the solubility product

*Tao Hu, Taibai Li, Xuncheng Liu, Zhongjie Wang, Liang Lou, Siqu Jing, Xiaohui Yan, Yige Xiong, Junkai Xiong, Xiang Ge\**

Department of Materials and Metallurgy, Guizhou University, Guiyang 550025, Guizhou, China

\*Corresponding Author

E-mail: [xge@gzu.edu.cn](mailto:xge@gzu.edu.cn) (Xiang Ge)

**Keywords:** Lithium-ion batteries recycle; Deep eutectic solvent; Precipitant-free strategy;  $K_{sp}$  regulation; Leachate reusability

## **Table of content in the supporting data:**

**Formula S1-S2:** quantification of leaching kinetics parameters.

**The main reactions involved in the recovery process.**

**Table S1.** A summary of metal leaching from spent LIBs.

**Table S2.** Energy and economic analysis of Pyrometallurgy, Hydrometallurgy<sup>1</sup> and this work.

**Table S3.** A brief comparison between Pyrometallurgy, Hydrometallurgy and this work.

**Table S4.** Solubility Product Constants at 25°C.

**Fig. S1.** (a) Digital photos showing that wasted LCO can be collected from the spent electrodes followed by thermal treatment to remove the binder and the conductive additives. (b and c) give the TG-DSC curve of (b) 50% PVDF: 50% acetylene black and (c) the black mass directly collected from the wasted electrode measured under air atmosphere at a heating rate of 5°C min<sup>-1</sup>. (d and e) show the SEM images (d) and the XRD pattern (e) of the LCO collected after the pre-treatment as shown in (a).

**Fig. S2.** Effect of different water content on cobalt precipitation

**Fig. S3.** (a) Effect of adding DIW in the DES on the cobalt separation process and (b) the effects of different solid-liquid ratio.

**Fig. S4.** (a) The leaching rate under different conditions (60-100°C, 0-240 min). (b and c) show the fitting of the activation energy ( $E_a = 21.7$  kJ/mol) in the leaching process.

**Fig. S5.** (a) SEM images of the precipitated brick-like  $\text{CoC}_2\text{O}_4 \cdot 2\text{H}_2\text{O}$  phase (a and b) and the annealed  $\text{Co}_3\text{O}_4$  (c and d). The annealed  $\text{Co}_3\text{O}_4$  resembles the morphology of

the  $\text{CoC}_2\text{O}_4 \cdot 2\text{H}_2\text{O}$  precursor, while pores were formed due to the topological shrinkage of the lattice; (e) the commercial LCO and (f) the regenerated LCO.

**Fig. S6.** 5x magnification version of digital photos.

**Fig. S7.** (a) Digital photos visualizing the lithium element can be extracted by direct cooling. (b) XRD patterns of the precipitated lithium compound recovered at different temperatures.

**Fig. S8.** SEM images of the precipitated Li compound in the form of oxalic salt.

**Fig. S9.** Energy and economic analysis of other recycling approaches and this work. (a) Cost, (b) revenue and (c) profit for Pyrometallurgy, Hydrometallurgy and this work. Radar charts with parameters in terms of environment and economy for (d) Pyrometallurgy, (f) Hydrometallurgy and (g) this work.

**Fig. S10:** Cycle performance of DES (90°C, 3 h). (a) Leaching efficiencies of Li and Co at different cycle numbers and (b) digital photos of DES after multiple cycles.

**Fig. S11:** (a) The CV and (b) EIS spectrum of the recycled and the commercial LCO samples.

**Movie S1:** Lithium extraction process by dynamically regulating the solubility product ( $K_{\text{sp}}$ ).

## Quantification of leaching kinetics parameters

### Formula S1:

Assuming that the proportion of Li in the leached ions remains invariant, the apparent reaction rate equation can be derived as follows:

$$1 - (1 - \eta)^{\frac{1}{3}} = Kt \quad (1)$$

where  $K$  denotes the rate constant,  $t$  represents the leaching time (min)<sup>2-4</sup>. This model is suitable for both diffusion control process and chemical reaction control process.

### Formula S2:

Based on the fitted  $K$  at various temperatures, the activation energy  $E_a$  can then be calculated using:

$$-\ln K = \frac{E_a}{RT} - \ln A \quad (2)$$

Where  $A$  is the pre-exponential factor,  $R$  is the molar gas constant,  $T$  is the thermodynamic temperature (K),  $E_a$  is the apparent activation energy (kJ/mol)<sup>5,6</sup>.

### The main reactions involved in the recovery process

Eq.(1) shows the overall leaching process of LCO with  $\text{ChCl:OA}^{4,7}$ , which results in the separation of Li and Co into different phases (soluble  $\text{Li}^+$  and solid state  $\text{Co}^{2+}$ ) as follows:

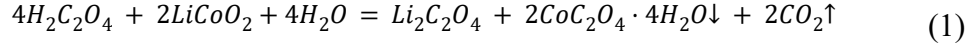

The following equations illustrate the detailed separation mechanism of Li and Co from spent LIBs:

(1) The extraction of Li by DES follows this mechanism <sup>8</sup>:

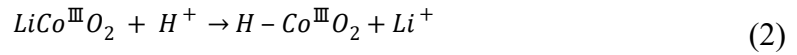

(2) The Co element undergoes the reduction from  $\text{Co}^{3+}$  to  $\text{Co}^{2+}$  and forms a chelate complex with  $\text{C}_2\text{O}_4^{2-}$ . With the existence deionized water, the cobalt precipitates as a stable compounds of  $\text{CoC}_2\text{O}_4 \cdot 4\text{H}_2\text{O}$  as a stable compound <sup>4</sup>. The corresponding reactions are shown in Eqs. (3) - (5).

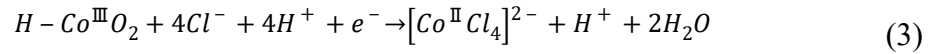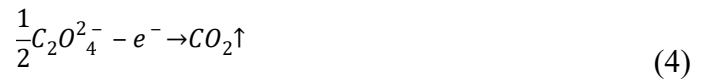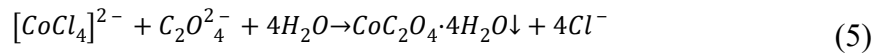

$\text{CoC}_2\text{O}_4 \cdot 2\text{H}_2\text{O}$  can be obtained by drying at  $100^\circ\text{C}$  for 10 h. Afterwards,  $\text{Co}_3\text{O}_4$  can be prepared by calcination as a precursor for regenerating LCO. The equations involved in this process are described as follows:

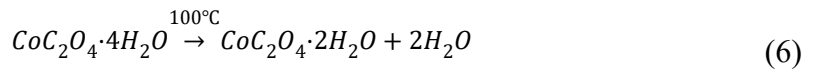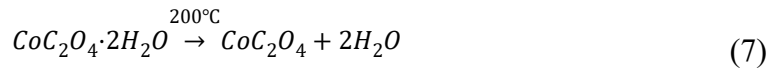

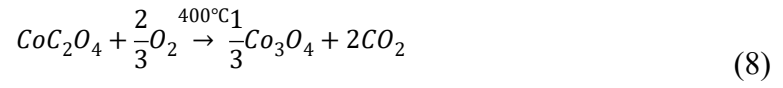

The regeneration of LCO material is achieved by using the regenerated  $Co_3O_4$  and  $Li_2C_2O_4$  as the precursors with a high temperature solid-phase method. The following equations describe the reactions involved in this process:

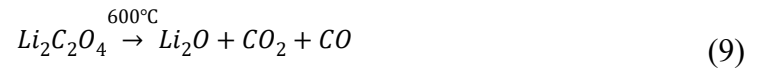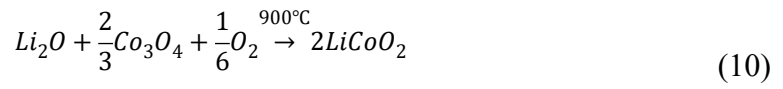

**Table S1.** A summary of metal leaching from spent LIBs.

| Category                     | Recycling method                                                          | Cathode | Condition |          | Leaching efficiency[%] |       | Ref. |
|------------------------------|---------------------------------------------------------------------------|---------|-----------|----------|------------------------|-------|------|
|                              |                                                                           |         | Time[min] | Temp[°C] | Li                     | Co    |      |
| Pyrometallurgy               | CTR Roasting (Graphite)                                                   | LCO     | 30        | 1000     | 98.93                  | 95.72 | 9    |
|                              | Salt assisted roasting (H <sub>2</sub> SO <sub>4</sub> )                  |         | 120       | 800      | 99.3                   | 98.7  | 10   |
|                              | Salt assisted roasting ((NH <sub>4</sub> ) <sub>2</sub> SO <sub>4</sub> ) |         | 120       | 400      | 98                     | 98    | 11   |
|                              | Salt assisted roasting ((NH <sub>4</sub> ) <sub>2</sub> SO <sub>4</sub> ) |         | 60        | 400      | 91.3                   | 93.5  | 12   |
| Conventional Hydrometallurgy | 0.4 M H <sub>2</sub> SO <sub>4</sub>                                      | LCO     | 10        | 200      | 77                     | 24    | 13   |
|                              | 0.4 M HNO <sub>3</sub>                                                    |         | 10        | 300      | 82                     | 37    | 13   |
|                              | 2 M H <sub>2</sub> SO <sub>4</sub> and 0.28 M glucose                     |         | 240       | 80       | 92                     | 88    | 14   |
|                              | 0.1 M citric acid + 0.02 M ascorbic acid                                  |         | 360       | 80       | 100                    | 80    | 15   |
|                              | 0.1 M iminodiacetic acid+0.02M ascorbic acid                              |         | 360       | 80       | 99                     | 91    | 16   |
| DESs                         | ChCl : Malic acid                                                         | LCO     | 240       | 60       | —                      | 81.2  | 17   |
|                              | ChCl : Malonic acid                                                       |         | 240       | 60       | —                      | 24.4  |      |
|                              | ChCl : EG                                                                 |         | 1440      | 180      | 89.81                  | 50.30 | 18   |
|                              | ChCl : EG                                                                 |         | 1440      | 160      | 28.4                   | 23.8  |      |
|                              | ChCl : EG                                                                 |         | 1440      | 80       |                        | ~0    |      |
|                              | ChCl : Urea                                                               |         | 1440      | 160      | 61.2                   | 64.2  | 19   |
|                              | ChCl : Urea                                                               |         | 720       | 170      | 68.7                   | 89.1  | 19   |
|                              | ChCl / Urea                                                               |         | 720       | 180      | 95                     | 98    | 19   |
|                              | EG / sulfosalicylic acid                                                  |         | 360       | 110      | 98                     | 93    | 20   |

|                  |                  |            |            |           |            |            |  |
|------------------|------------------|------------|------------|-----------|------------|------------|--|
|                  | dihydrate        |            |            |           |            |            |  |
| <b>This work</b> | <b>ChCl / OA</b> | <b>LCO</b> | <b>180</b> | <b>90</b> | <b>~95</b> | <b>~98</b> |  |

**Table S2.** Energy and economic analysis of Pyrometallurgy, Hydrometallurgy<sup>1</sup> and this work.

|                                           | Pyrometallurgy | Hydrometallurgy | This work |
|-------------------------------------------|----------------|-----------------|-----------|
| Cost (\$ kg <sup>-1</sup> )               | 4.87           | 4.35            | 3.2       |
| Revenue (\$ kg <sup>-1</sup> )            | 4.90           | 6.35            | 13.92     |
| Profit (\$ kg <sup>-1</sup> )             | 0.03           | 2.00            | 10.72     |
| Energy consumption (MJ kg <sup>-1</sup> ) | 10.71          | 19.57           | 5.8       |
| GHG emission (g kg <sup>-1</sup> )        | 2183           | 1468            | 449       |

**Table S3.** A brief comparison between Pyrometallurgy, Hydrometallurgy and this work.

| Pyrometallurgy             | Hydrometallurgy                  | This work                    |
|----------------------------|----------------------------------|------------------------------|
| High temperature treatment | Intermediate operation condition | Mild operation condition     |
| High energy consumption    | Corrosive acids                  | Green and energy reservation |
| With waste disposal        | Non-recyclable                   | Leachant reusable            |
| High GHG emission          | Moderate GHG emission            | Low GHG emission             |

**Table S4.** Solubility Product Constants at 25°C<sup>7, 21</sup>.

| No. | Compound                        | K <sub>sp</sub>        |
|-----|---------------------------------|------------------------|
| 1   | Co(OH) <sub>2</sub>             | $1.0 \times 10^{-15}$  |
| 2   | CoCO <sub>3</sub>               | $12.0 \times 10^{-11}$ |
| 3   | Ni(OH) <sub>2</sub>             | $3.1 \times 10^{-15}$  |
| 4   | NiCO <sub>3</sub>               | $6.8 \times 10^{-8}$   |
| 5   | Mn(OH) <sub>2</sub>             | $1.7 \times 10^{-13}$  |
| 6   | MnCO <sub>3</sub>               | $3.3 \times 10^{-11}$  |
| 7   | CoC <sub>2</sub> O <sub>4</sub> | $4.09 \times 10^{-8}$  |
| 8   | NiC <sub>2</sub> O <sub>4</sub> | $4.31 \times 10^{-9}$  |

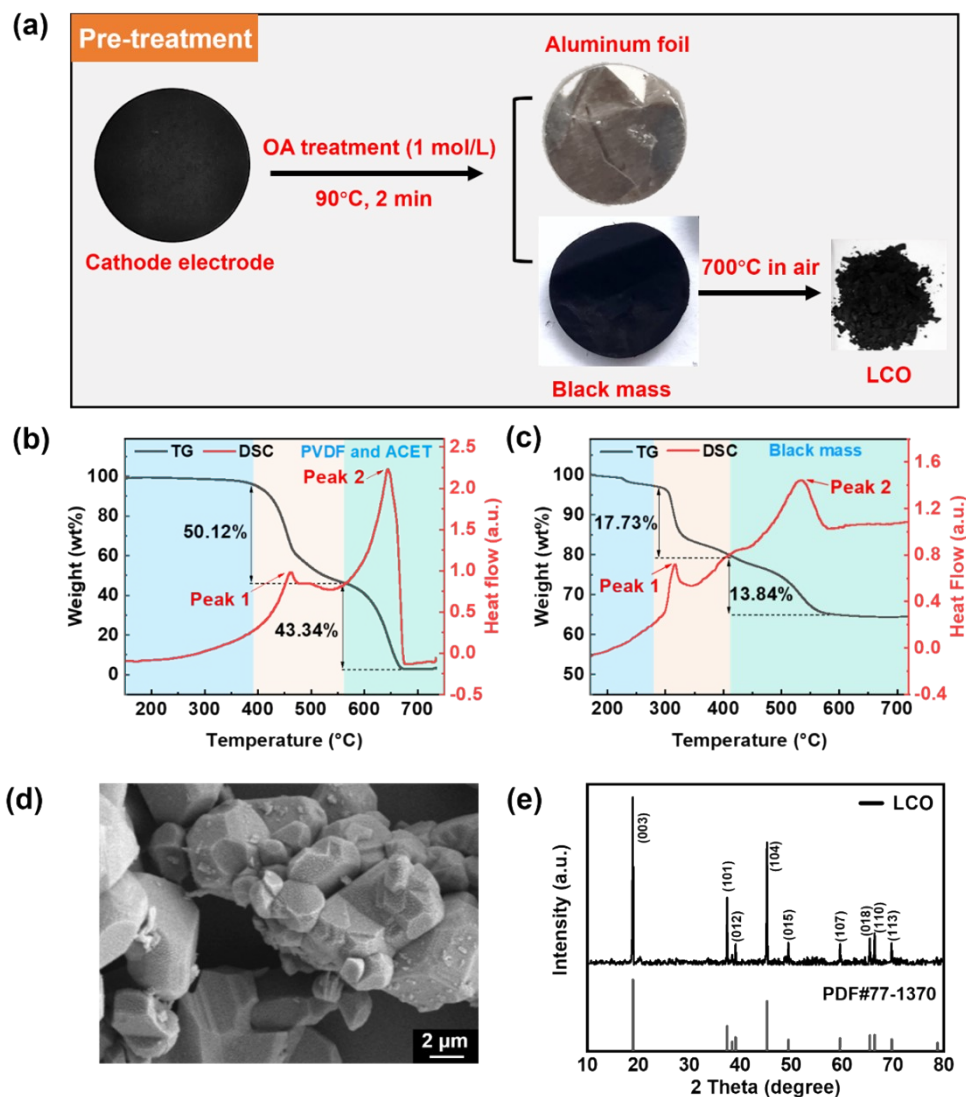

**Fig. S1** (a) Digital photos showing that wasted LCO can be collected from the spent electrodes followed by thermal treatment to remove the binder and the conductive additives. (b and c) give the TG-DSC curve of (b) 50% PVDF: 50% acetylene black and (c) the black mass directly collected from the wasted electrode measured under air atmosphere at a heating rate of  $5^{\circ}\text{C min}^{-1}$ . (d and e) show the SEM images (d) and the XRD pattern (e) of the LCO collected after the pre-treatment as shown in (a).

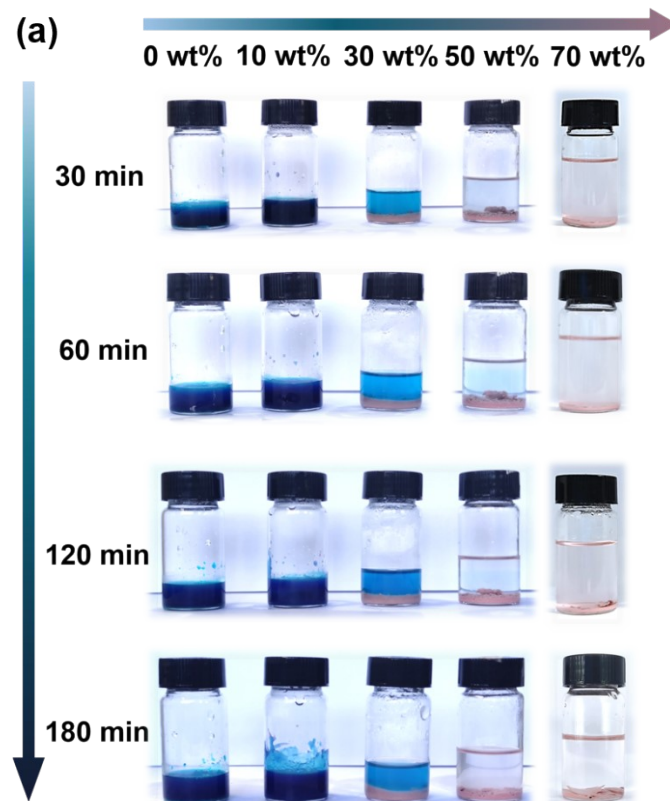

**Fig. S2 Effect of different water content on cobalt precipitation**

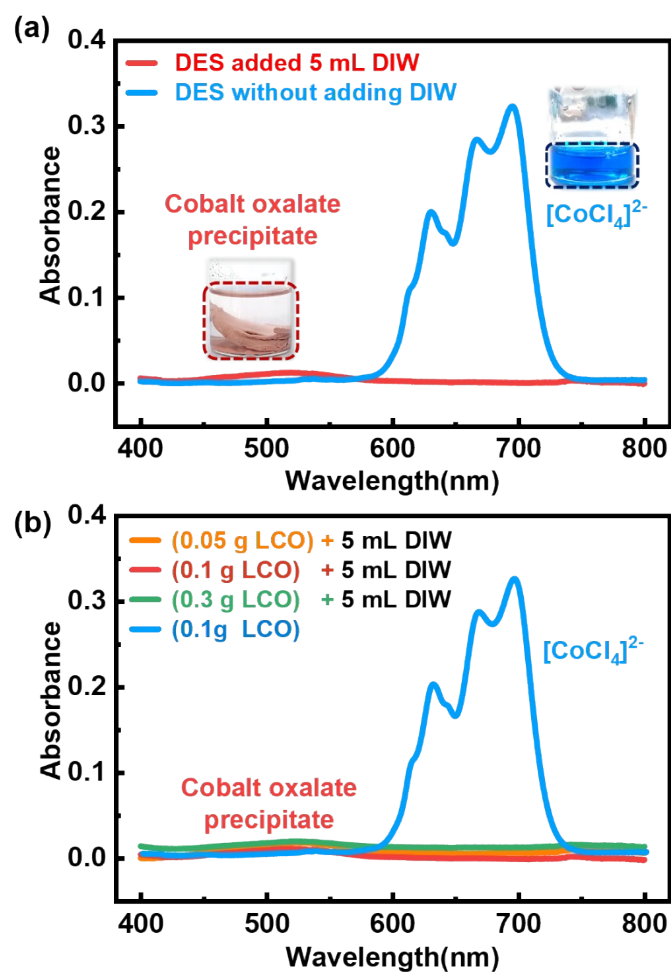

**Fig. S3 (a) Effect of adding DIW in the DES on the cobalt separation process and (b) the effects of different solid-liquid ratio.** With the existence of DIW, the characteristic peak of  $[\text{CoCl}_4]^{2-}$  was not observed in the UV-Vis spectra. For the leaching solution without DIW, three characteristic bands (630, 667 and 696 nm) indicate the formation of  $[\text{CoCl}_4]^{2-}$ . The results shed light on the transformation process of the cobalt element.

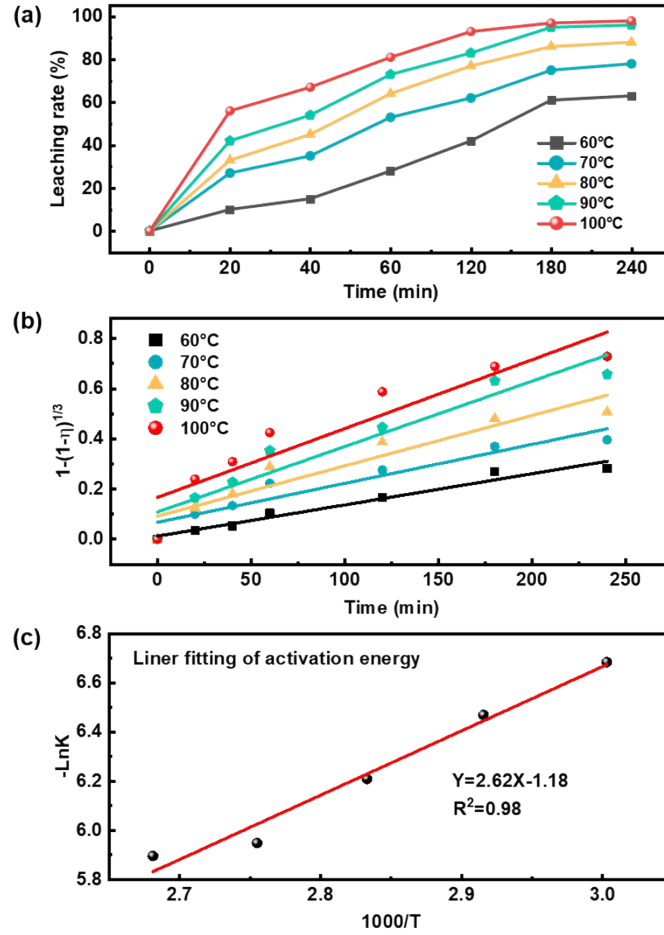

**Fig. S4.** (a) The leaching rate under different conditions (60-100°C, 0-240 min). (b and c) show the fitting of the activation energy ( $E_a = 21.7$  kJ/mol) in the leaching process.

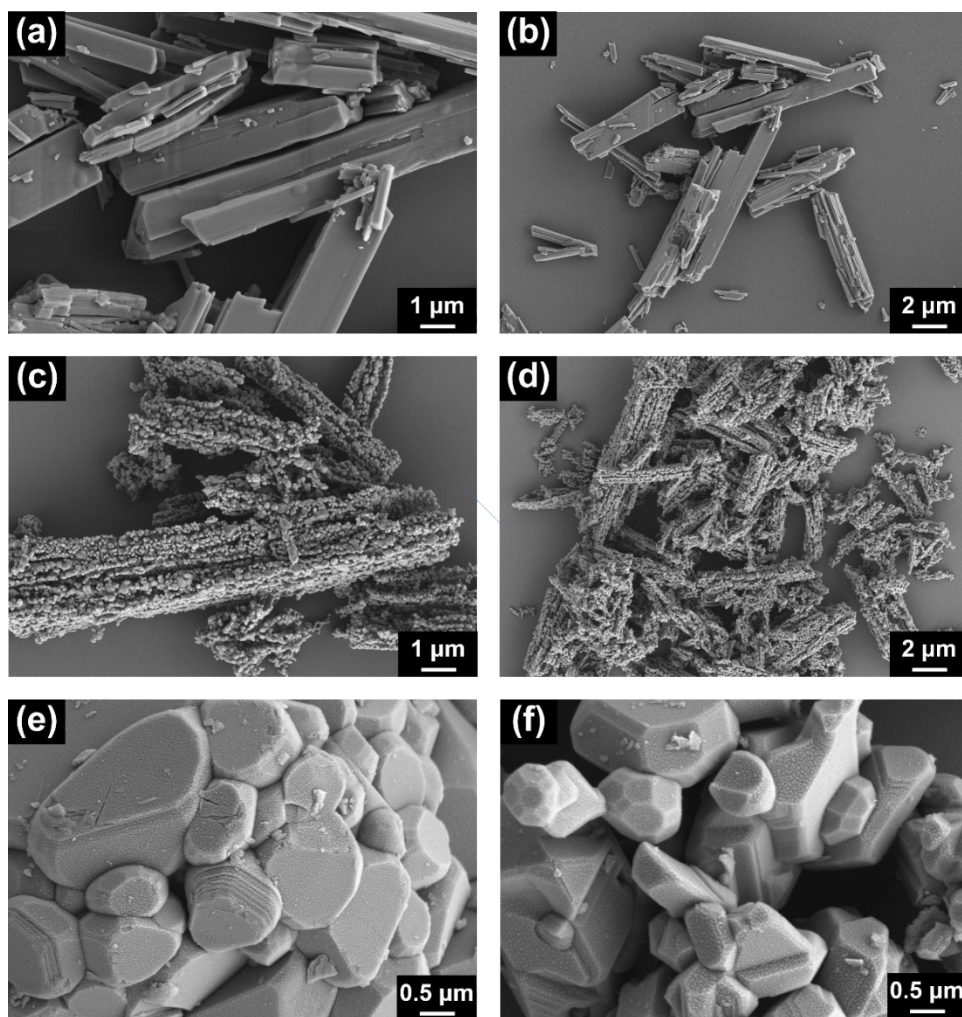

**Fig. S5. SEM images of the precipitated brick-like  $\text{CoC}_2\text{O}_4 \cdot 2\text{H}_2\text{O}$  phase (a and b) and the annealed  $\text{Co}_3\text{O}_4$  (c and d). The annealed  $\text{Co}_3\text{O}_4$  resembles the morphology of the  $\text{CoC}_2\text{O}_4 \cdot 2\text{H}_2\text{O}$  precursor, while pores were formed due to the topological shrinkage of the lattice; (e) the commercial LCO and (f) the regenerated LCO.**

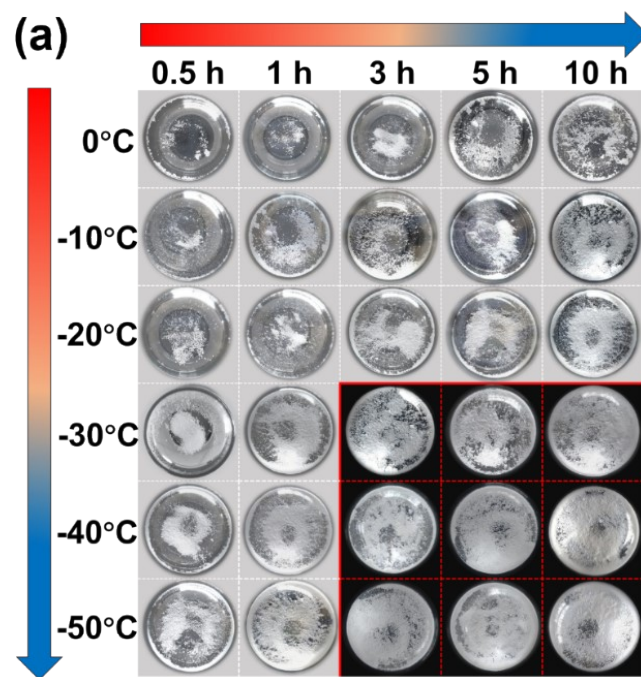

**Fig. S6.** 5x magnification version of digital photos.

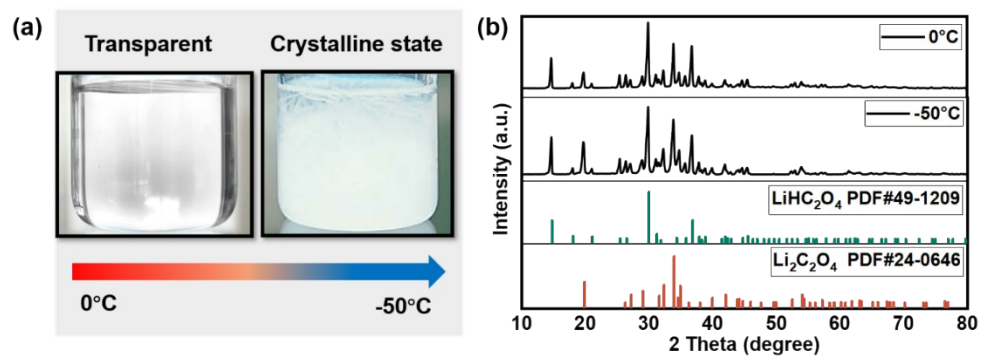

**Fig. S7. (a) Digital photos visualizing the lithium element can be extracted by direct cooling. (b) XRD patterns of the precipitated lithium compound recovered at different temperatures.**

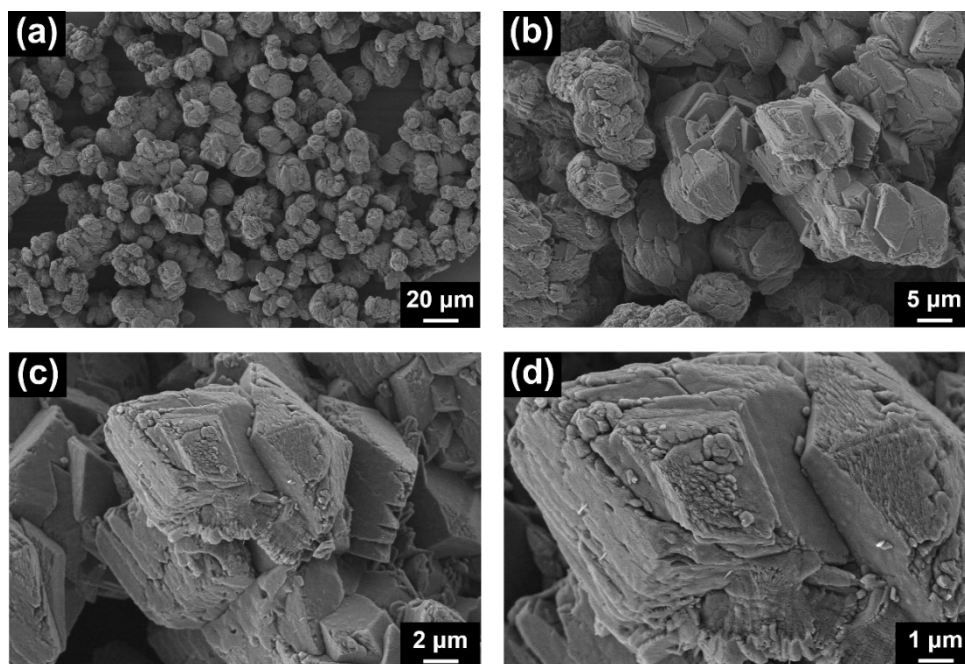

**Fig. S8. SEM images of the precipitated Li compound in the form of oxalic salt.**

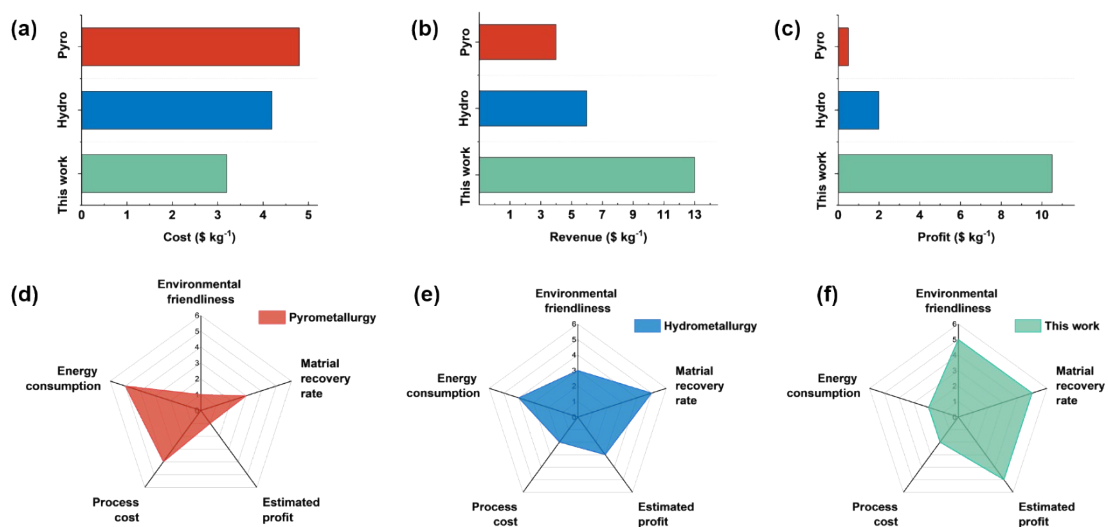

**Fig. S9. Energy and economic analysis of other recycling approaches and this work. (a) Cost, (b) revenue and (c) profit for Pyrometallurgy, Hydrometallurgy and this work. Radar charts with parameters in terms of environment and economy for (d) Pyrometallurgy, (e) Hydrometallurgy and (f) this work.**

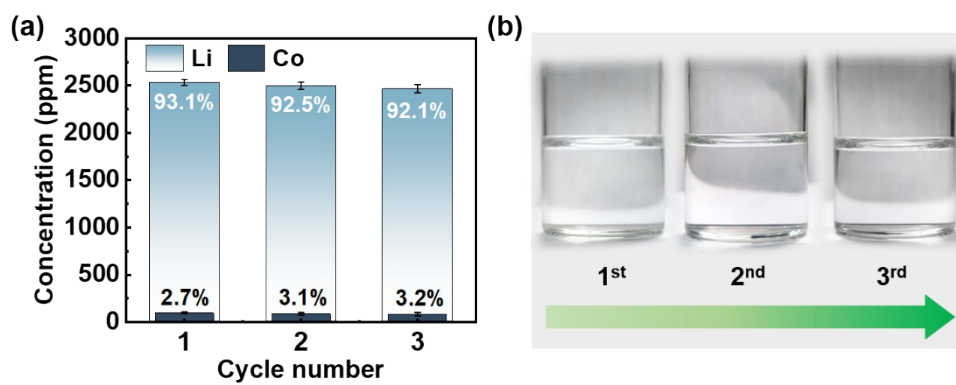

**Fig. S10. Cycle performance of DES (90°C, 3 h). (a) Leaching efficiencies of Li and Co at different cycle numbers and (b) digital photos of DES after multiple cycles.**

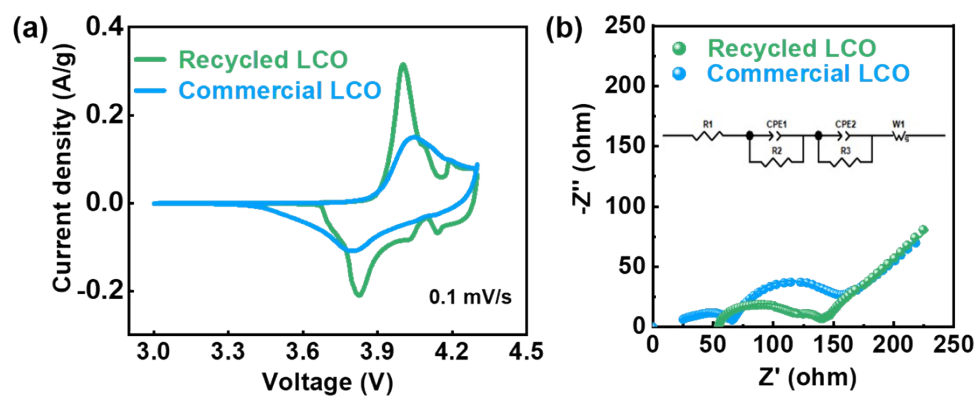

**Fig. S11. (a) The CV and (b) EIS spectrum of the recycled and the commercial LCO samples.**

## References

1. Z. Chen, R. Feng, W. Wang, S. Tu, Y. Hu, X. Wang, R. Zhan, J. Wang, J. Zhao, S. Liu, L. Fu and Y. Sun, *Nature Communications*, 2023, **14**, 4648.
2. L. P. He, S. Y. Sun, X. F. Song and J. G. Yu, *Waste Manage.*, 2017, **64**, 171-181.
3. W. Gao, X. Zhang, X. Zheng, X. Lin, H. Cao, Y. Zhang and Z. Sun, *Environ. Sci. Technol.*, 2017, **51**, 1662-1669.
4. T. Li, Y. Xiong, X. Yan, T. Hu, S. Jing, Z. Wang and X. Ge, *J. Energy Chem.*, 2022, **72**, 532-538.
5. Y. Hua, Y. Sun, F. Yan, S. Wang, Z. Xu, B. Zhao and Z. Zhang, *Chem. Eng. J.*, 2021, **436**, 133200.
6. P. Panagiotopoulou, E. E. Karamerou and D. I. Kondarides, *Catal. Today*, 2013, **209**, 91-98.
7. A. Verma, R. Kore, D. R. Corbin and M. B. Shiflett, *Ind. Eng. Chem. Res.*, 2019, **58**, 15381-15393.
8. Q. Lu, L. Chen, X. Li, Y. Chao, J. Sun, H. Ji and W. Zhu, *ACS Sustain. Chem. Eng.*, 2021, **9**, 13851-13861.
9. J. Li, G. Wang and Z. Xu, *Journal of Hazardous Materials*, 2016, **302**, 97-104.
10. J. Lin, C. Liu, H. Cao, R. Chen, Y. Yang, L. Li and Z. Sun, *Green Chemistry*, 2019, **21**, 5904-5913.
11. Y. Tang, B. Zhang, H. Xie, X. Qu, P. Xing and H. Yin, *Journal of Power Sources*, 2020, **474**, 228596.
12. J. Wang, Z. Liang, Y. Zhao, J. Sheng, J. Ma, K. Jia, B. Li, G. Zhou and H.-M. Cheng, *Energy Storage Materials*, 2022, **45**, 768-776.
13. T. Aikawa, M. Watanabe, T. M. Aida and R. L. Smith, *Kagaku Kogaku Ronbunshu*, 2017, **43**, 313-318.
14. F. Pagnanelli, E. Moscardini, G. Granata, S. Cerbelli, L. Agosta, A. Fieramosca and L. Toro, *Journal of Industrial and Engineering Chemistry*, 2014, **20**, 3201-3207.
15. G. Nayaka, J. Manjanna, K. Pai, R. Vadavi, S. Keny and V. Tripathi, *Hydrometallurgy*, 2015, **151**, 73-77.
16. G. Nayaka, K. Pai, G. Santhosh and J. Manjanna, *Hydrometallurgy*, 2016, **161**, 54-57.
17. N. Peeters, K. Binnemans and S. Riaño, *Green Chemistry*, 2020, **22**, 4210-4221.
18. M. K. Tran, M.-T. F. Rodrigues, K. Kato, G. Babu and P. M. Ajayan, *Nature Energy*, 2019, **4**, 339-345.
19. S. Wang, Z. Zhang, Z. Lu and Z. Xu, *Green Chemistry*, 2020, **22**, 4473-4482.
20. S. Tang, M. Zhang and M. Guo, *ACS Sustainable Chemistry & Engineering*, 2022, **10**, 975-985.
21. J. R. L. Rumble, D. R.; Bruno, T. J., *CRC handbook of chemistry and physics: a ready-reference book of chemical and physical data.*, CRC Press: Boca Raton, 2018.
